# Supplementary material
Source: publisher site journal article supplement (https://static.cambridge.org/content/id/urn:cambridge.org:id:article:S0958344020000154/resource/name/S0958344020000154supp001.pdf)
Supplement: Supplementary file 1 [file S0958344020000154supp001.pdf]

## Appendix 1: Post-task questionnaire (English version)

| Statement number | Statement                                                                               |
|------------------|-----------------------------------------------------------------------------------------|
| 1                | I never feel quite sure of myself when I am speaking in my foreign language class.      |
| 2#               | I don't worry about making mistakes in language class.                                  |
| 3                | I start to panic when I must speak without preparation in language class.               |
| 4                | In language class, I can get so nervous I forget things I know.                         |
| 5                | Even if I am well prepared for language class, I feel anxious about it                  |
| 6#               | I feel confident when I speak in foreign language class.                                |
| 7                | I am afraid that the other students will laugh at me when I speak the foreign language. |
| 8                | Chatting in pairs decreased my anxiety.                                                 |
| 9                | I feel like I want to chat with native speakers now.                                    |
| 10#              | There were communication problems when using this mode of communication.                |
| 11#              | I didn't have time to think before speaking with this mode of communication.            |
| 12               | It was easy to express my feelings with this mode of communication.                     |
| 13#              | I was not worried about my pronunciation using this mode of communication.              |
| 14#              | It was difficult to understand my partner using this mode of communication.             |

\* # = opposite weighting

## Appendix 2: Post-experiment questionnaire

| Item number | Item details [1 = strongly disagree, 10 = strongly agree]                                                     |
|-------------|---------------------------------------------------------------------------------------------------------------|
| 1           | <b>It was easy to communicate in English with this system.</b><br>Voice:<br>Video:<br>VR:                     |
|             | <b>It was fun to learn with this system.</b><br>Voice:<br>Video:<br>VR:                                       |
| 3#          | <b>It was difficult to complete the task with this system.</b><br>Voice:<br>Video:<br>VR:                     |
| 4           | <b>I think this was an effective system for learning English.</b><br>Voice:<br>Video:<br>VR:                  |
| 5           | <b>My anxiety was reduced when completing English activities with this system.</b><br>Voice:<br>Video:<br>VR: |

\* # = opposite weighting

Finally, if you have a comment regarding your experiences, please write it below:

---

---

### Appendix 3: Warm-up task worksheet

The pre-task warm up activity can be viewed in its entirety [here](#).

## Spot the difference task: Warm up

In this lesson, you will work with a partner. You will compare two pictures of the same room. There are six items placed in the room, but some of them are in a different place to your partner. This is a spot-the-difference activity. You will have to decide which of the items are the same and which are different.

### Activity 1: What is in your living room?

Think of the objects that you find in a living room and make a list of 10 things here:

|       |       |
|-------|-------|
| _____ | _____ |
| _____ | _____ |
| _____ | _____ |
| _____ | _____ |
| _____ | _____ |

### Activity 2: Positions of place

Look at the following picture. The cat 🐱 and bird 🐦 are in different positions in relation to the box.

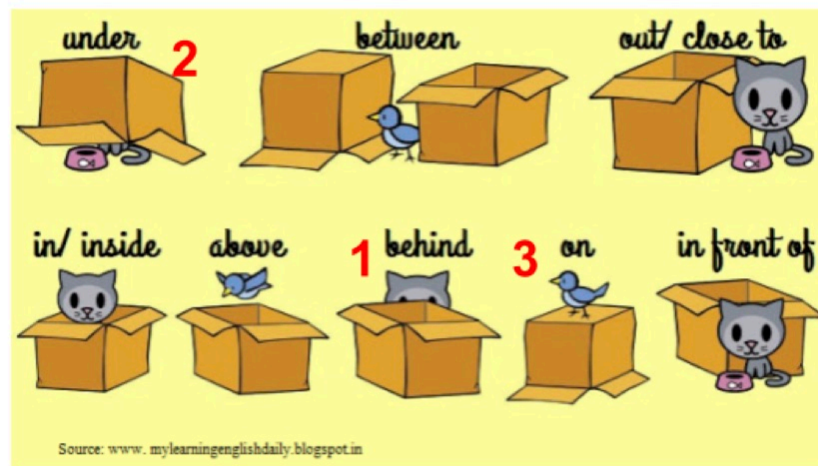

Please write sentences for the three pictures labelled **1**, **2** and **3**. For example: *The cat is in the box.*

1. \_\_\_\_\_
2. \_\_\_\_\_
3. \_\_\_\_\_

### Activity 3: Label the items.

Please label the items marked with a textbox:

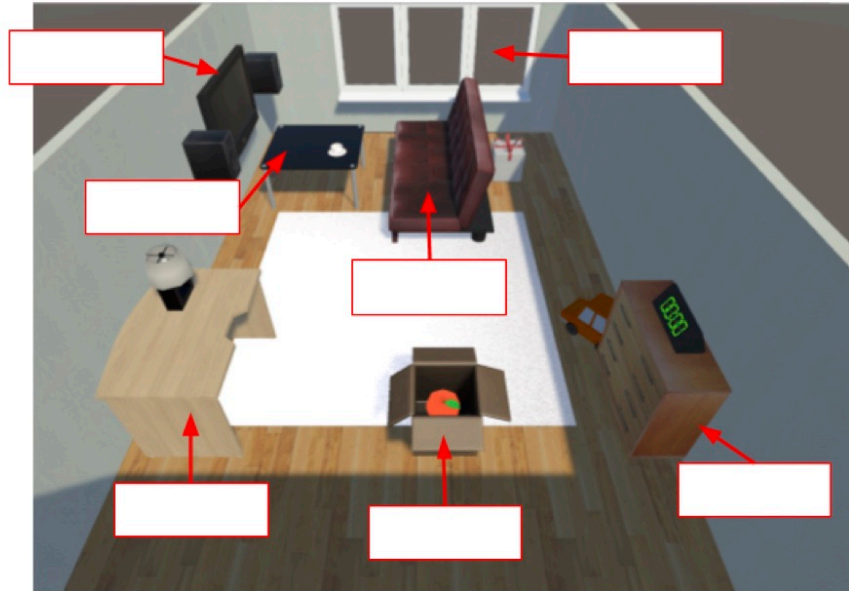

### Activity 4: Where are the objects?

In this room, there are the following objects:

|                                                                                                     |                                                                                                       |                                                                                                       |
|-----------------------------------------------------------------------------------------------------|-------------------------------------------------------------------------------------------------------|-------------------------------------------------------------------------------------------------------|
| 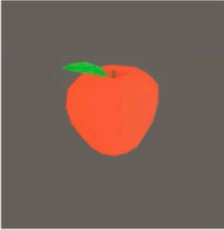<br><b>Apple</b> | <br><b>Lamp</b>    | <br><b>Clock</b> |
| <br><b>Car</b>   | <br><b>Present</b> | <br><b>Cup</b>   |

Please mark the following sentences correct or incorrect.

Please use a ✓ for correct sentences.

Please use a ✗ for incorrect sentences.

For example:

*The apple is on the box.*       ✗   

1. The clock is on the chest of drawers. \_\_\_\_\_
2. The car is in front of the chest of drawers. \_\_\_\_\_
3. The present is on the sofa. \_\_\_\_\_
4. The lamp is on the desk. \_\_\_\_\_
5. The cup is in front of the tv. \_\_\_\_\_
